# Supplementary material
Source: ML conference proceedings conference paper supplement (https://openreview.net/forum?id=sJPz-4Rwghv)
Supplement: supplementary_material [file attachment]

# Survey Responses

## Section 1: Personal Information

Where are you currently located?

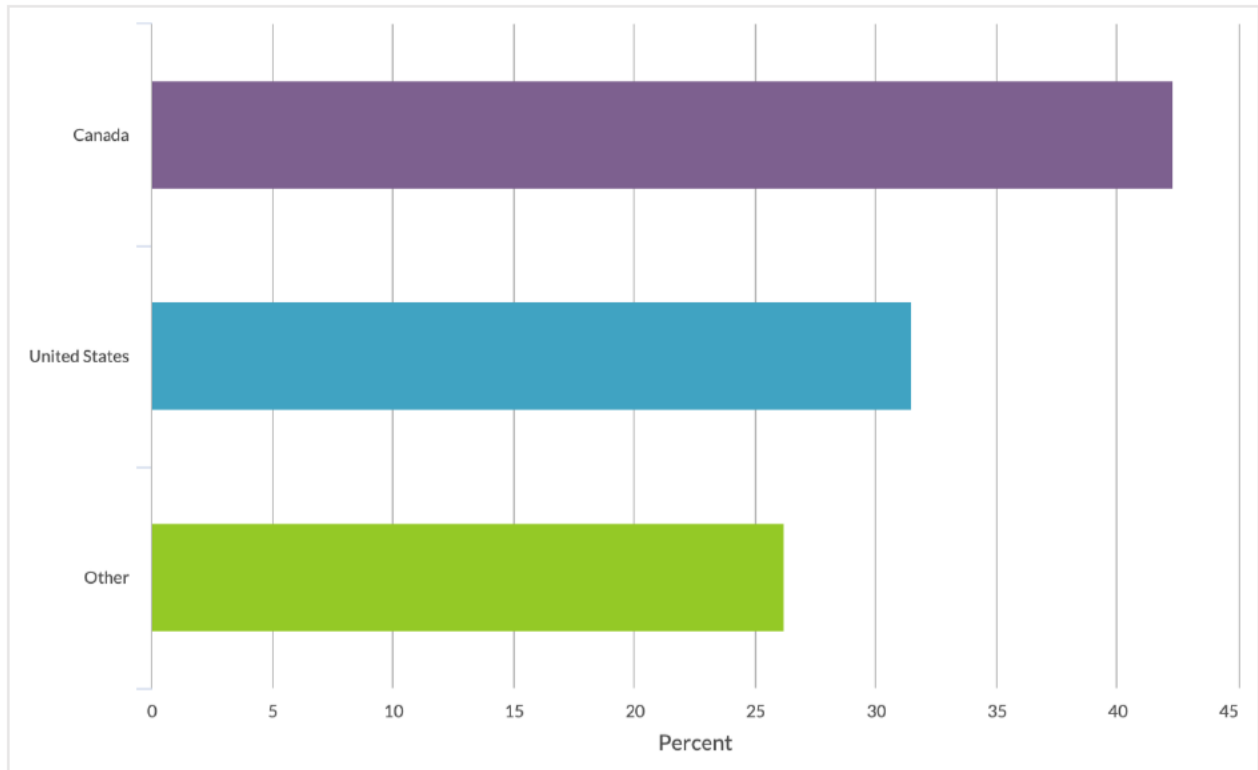

Table 1. Geographic location of participants

| Geographic location | n  | %     |
|---------------------|----|-------|
| Canada              | 55 | 42.3% |
| United States       | 41 | 31.5% |
| Other               | 34 | 26.2% |

Which of the following categories best describes the industry you primarily work in?

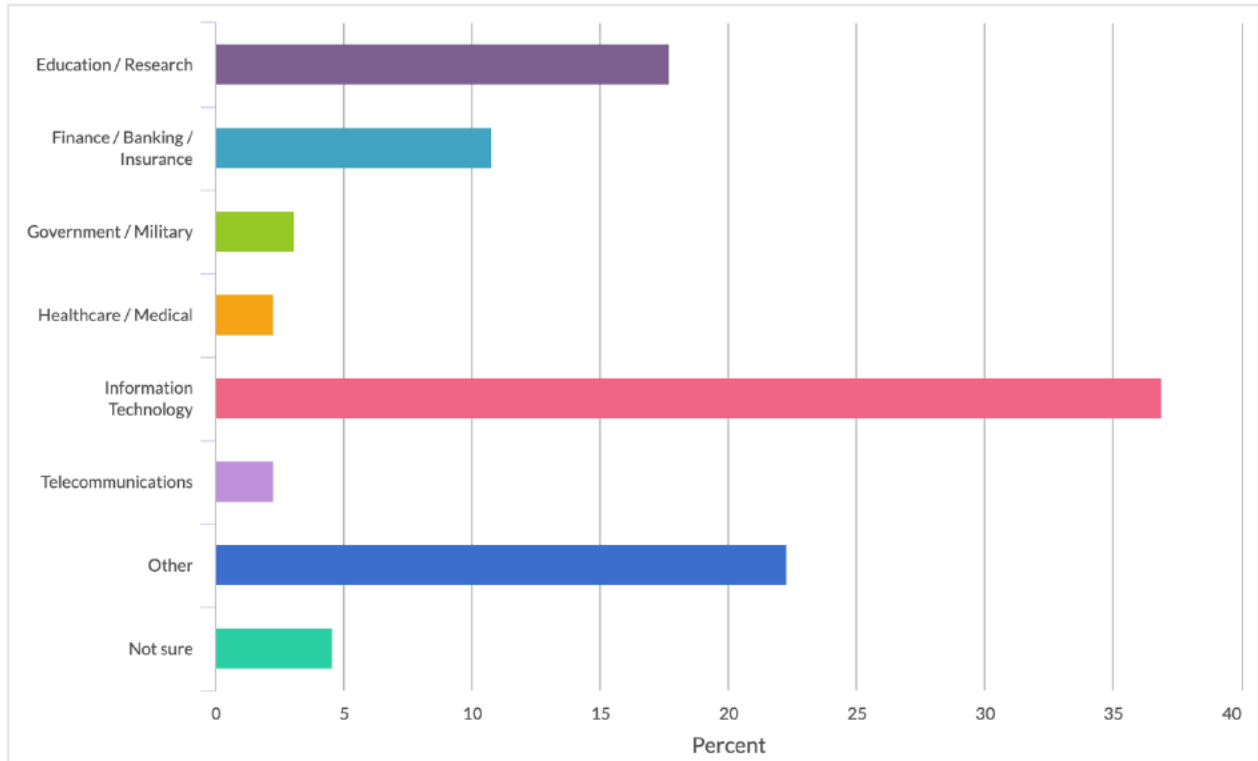

Table 2. Industries participants work in

| <i>Industry</i>               | <i>n</i> | <i>%</i> |
|-------------------------------|----------|----------|
| Education / Research          | 23       | 17.7%    |
| Finance / Banking / Insurance | 14       | 10.8%    |
| Government / Military         | 4        | 3.1%     |
| Healthcare / Medical          | 3        | 2.3%     |
| Information Technology        | 48       | 36.9%    |
| Telecommunications            | 3        | 2.3%     |
| Other                         | 29       | 22.3%    |
| Not sure                      | 6        | 4.6%     |

What is the highest level of education you have completed? (If you're currently enrolled in school, please indicate the highest degree you have received.)

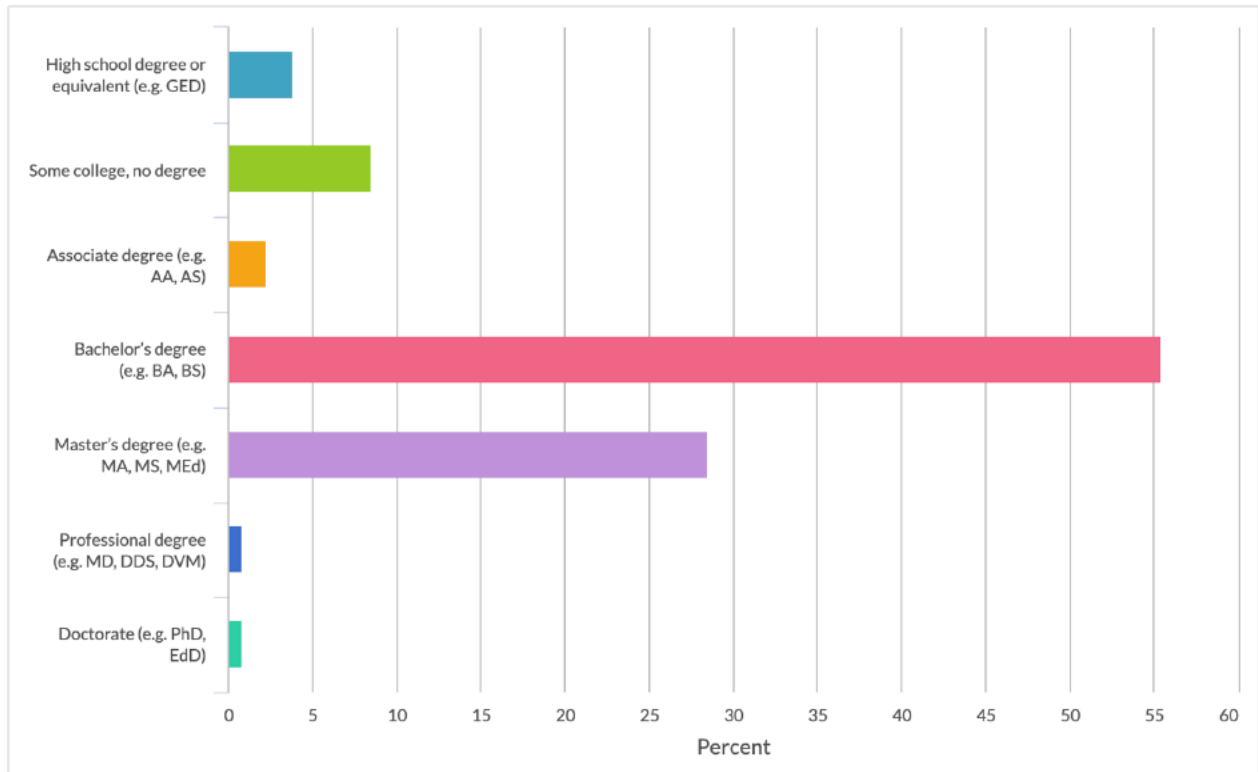

Table 3. Education level of participants

| <i>Education level</i>                      | <i>n</i> | <i>%</i> |
|---------------------------------------------|----------|----------|
| High school degree or equivalent (e.g. GED) | 5        | 3.8%     |
| Some college, no degree                     | 11       | 8.5%     |
| Associate degree (e.g. AA, AS)              | 3        | 2.3%     |
| Bachelor's degree (e.g. BA, BS)             | 72       | 55.4%    |
| Master's degree (e.g. MA, MS, MEd)          | 37       | 28.5%    |
| Professional degree (e.g. MD, DDS, DVM)     | 1        | 0.8%     |
| Doctorate (e.g. PhD, EdD)                   | 1        | 0.8%     |

Have you received any professional training or education in design, usability, user experience, and/or human-computer interaction?

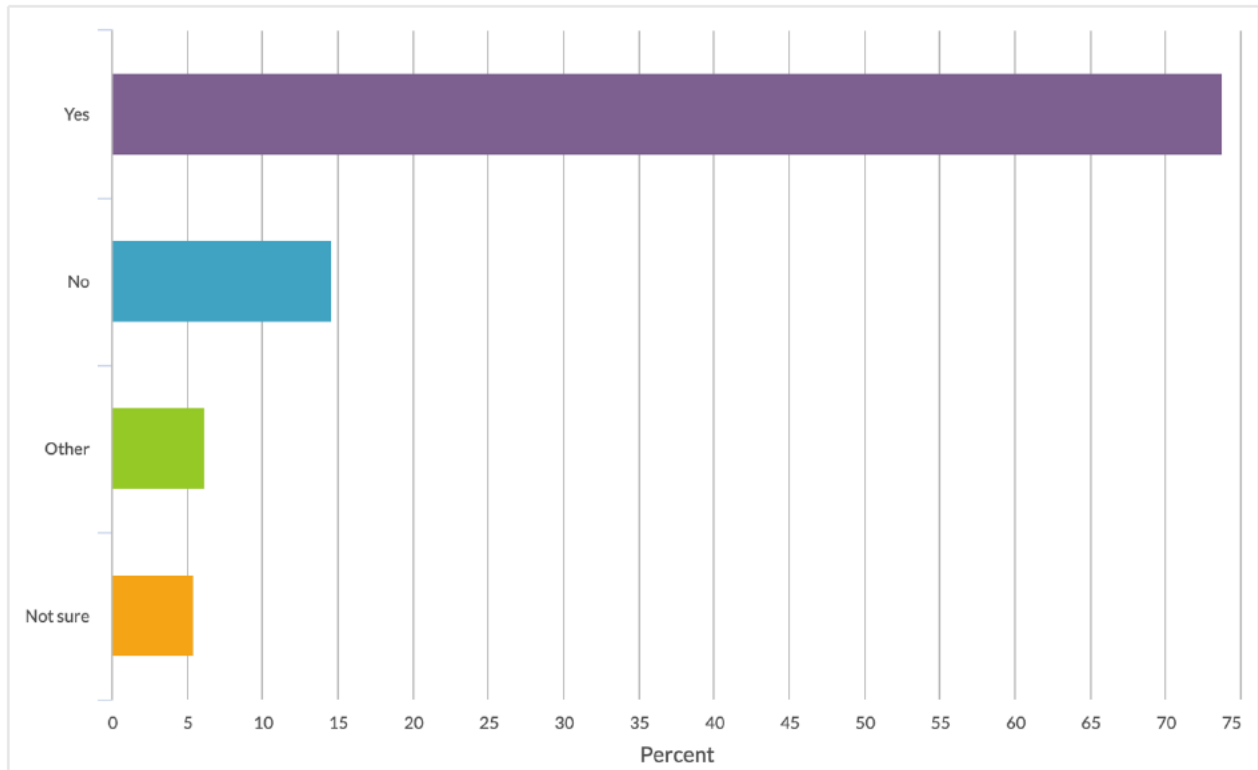

Table 4. Professional education in HCI/UX

| <i>Professional education in HCI/UX</i> | <i>n</i> | <i>%</i> |
|-----------------------------------------|----------|----------|
| Yes                                     | 96       | 73.8%    |
| No                                      | 19       | 14.6%    |
| Other                                   | 8        | 6.2%     |
| Not sure                                | 7        | 5.4%     |

How would you describe your experience in this field? (Please indicate your personal subjective rating of your experience.)

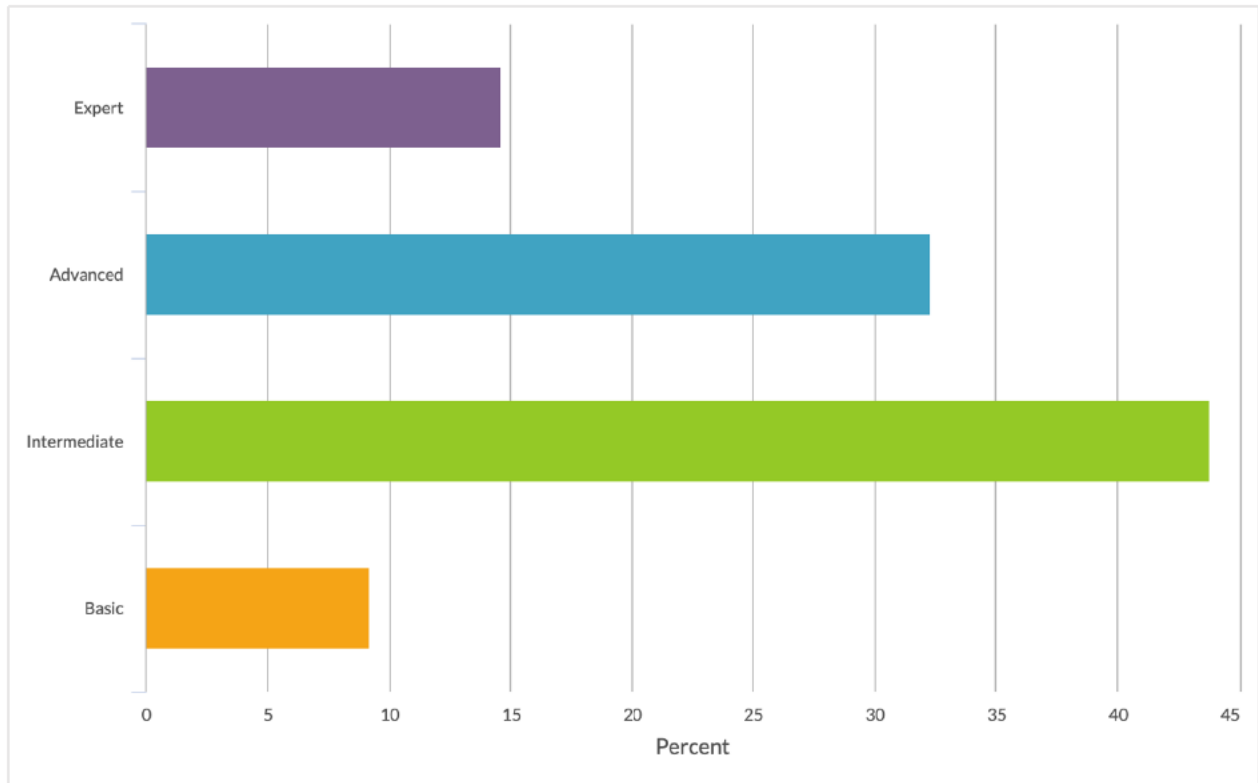

Table 5. Level of experience in HCI/UX

| Level of experience | n  | %     |
|---------------------|----|-------|
| Expert              | 19 | 14.6% |
| Advanced            | 42 | 32.3% |
| Intermediate        | 57 | 43.8% |
| Basic               | 12 | 9.2%  |

## Section 2: General Understanding and Awareness

What kind of professional training or education have you received in web accessibility? (Check all that apply.)

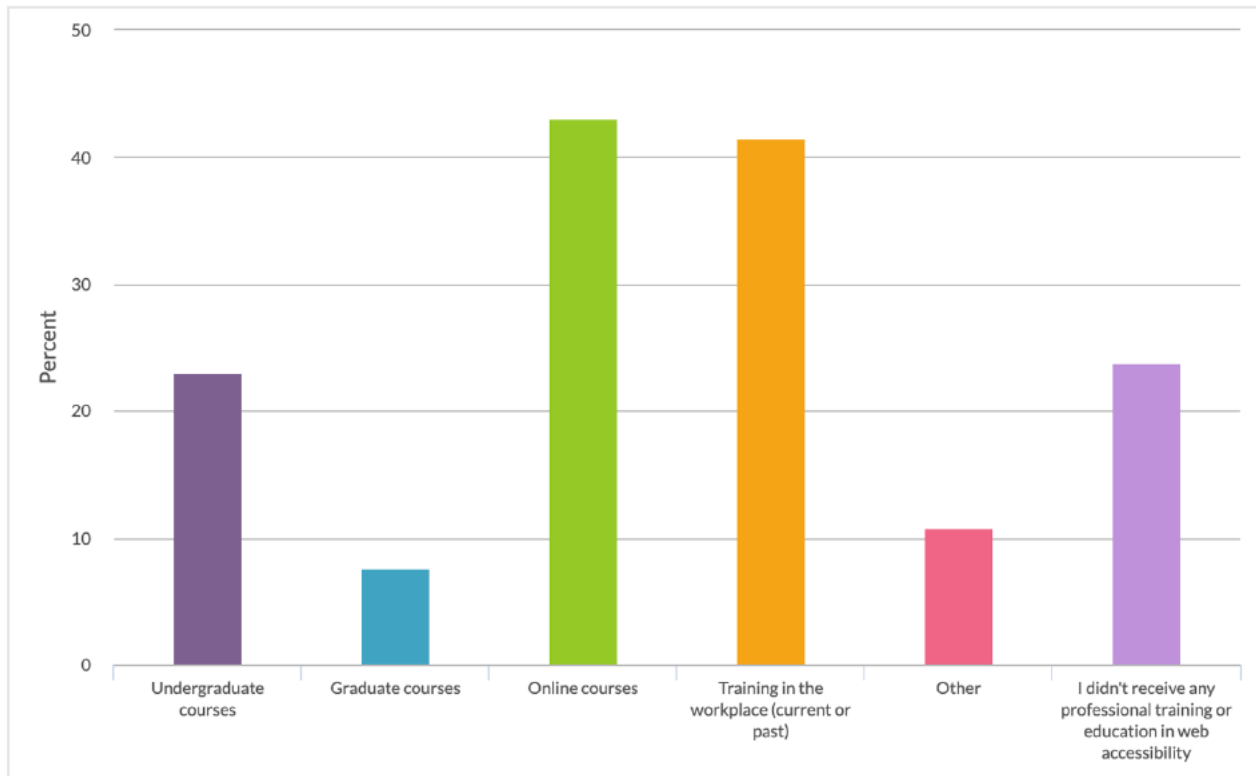

Table 6. Participation in web accessibility training

| <i>Web accessibility training and education</i>                              | <i>n</i> | <i>%</i> |
|------------------------------------------------------------------------------|----------|----------|
| Undergraduate courses                                                        | 30       | 23.1%    |
| Graduate courses                                                             | 10       | 7.7%     |
| Online courses                                                               | 56       | 43.1%    |
| Training in the workplace (current or past)                                  | 54       | 41.5%    |
| Other                                                                        | 14       | 10.8%    |
| I didn't receive any professional training or education in web accessibility | 31       | 23.8%    |

Describe your understanding of how seniors use websites.

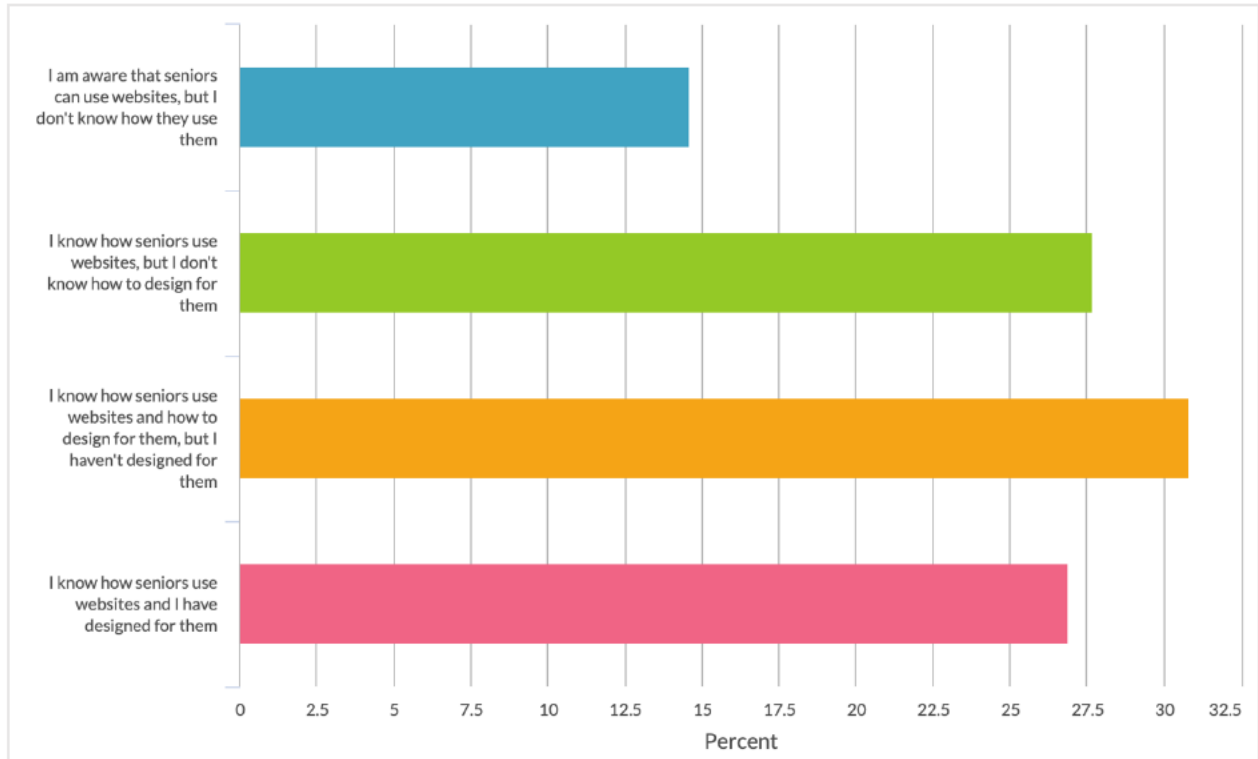

Table 7. Understanding of how seniors use websites

| <i>Level of understanding of how seniors use websites</i>                                   | <i>n</i> | <i>%</i> |
|---------------------------------------------------------------------------------------------|----------|----------|
| I am aware that seniors can use websites, but I don't know how they use them                | 19       | 14.6%    |
| I know how seniors use websites, but I don't know how to design for them                    | 36       | 27.7%    |
| I know how seniors use websites and how to design for them, but I haven't designed for them | 40       | 30.8%    |
| I know how seniors use websites and I have designed for them                                | 35       | 26.9%    |

Are you familiar with any of the following assistive technologies? (Check all that apply.)

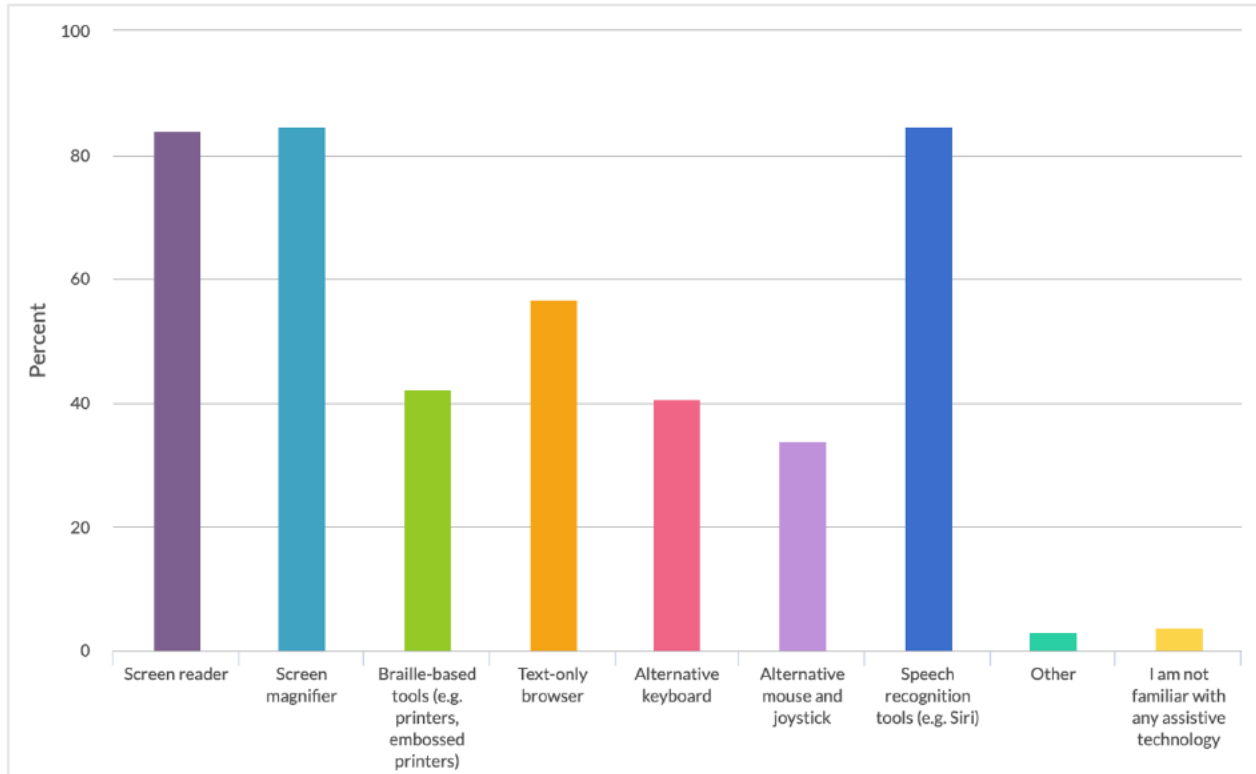

Table 8. Familiarity with assistive technologies

| <i>Assistive technologies</i>                          | <i>n</i> | <i>%</i> |
|--------------------------------------------------------|----------|----------|
| Screen reader                                          | 109      | 83.8%    |
| Screen magnifier                                       | 110      | 84.6%    |
| Braille-based tools (e.g. printers, embossed printers) | 55       | 42.3%    |
| Text-only browser                                      | 74       | 56.9%    |
| Alternative keyboard                                   | 53       | 40.8%    |
| Alternative mouse and joystick                         | 44       | 33.8%    |
| Speech recognition tools (e.g. Siri)                   | 110      | 84.6%    |
| Other                                                  | 4        | 3.1%     |
| I am not familiar with any assistive technology        | 5        | 3.8%     |



Are you familiar with accessibility legislations, such as Accessibility for Ontarians with Disabilities Act (AODA) by the Ontario government in Canada, Americans with Disability Act (ADA) and Section 508 by the U. S. Federal government, or similar laws from other governments around the world (i.e., England, Australia)?

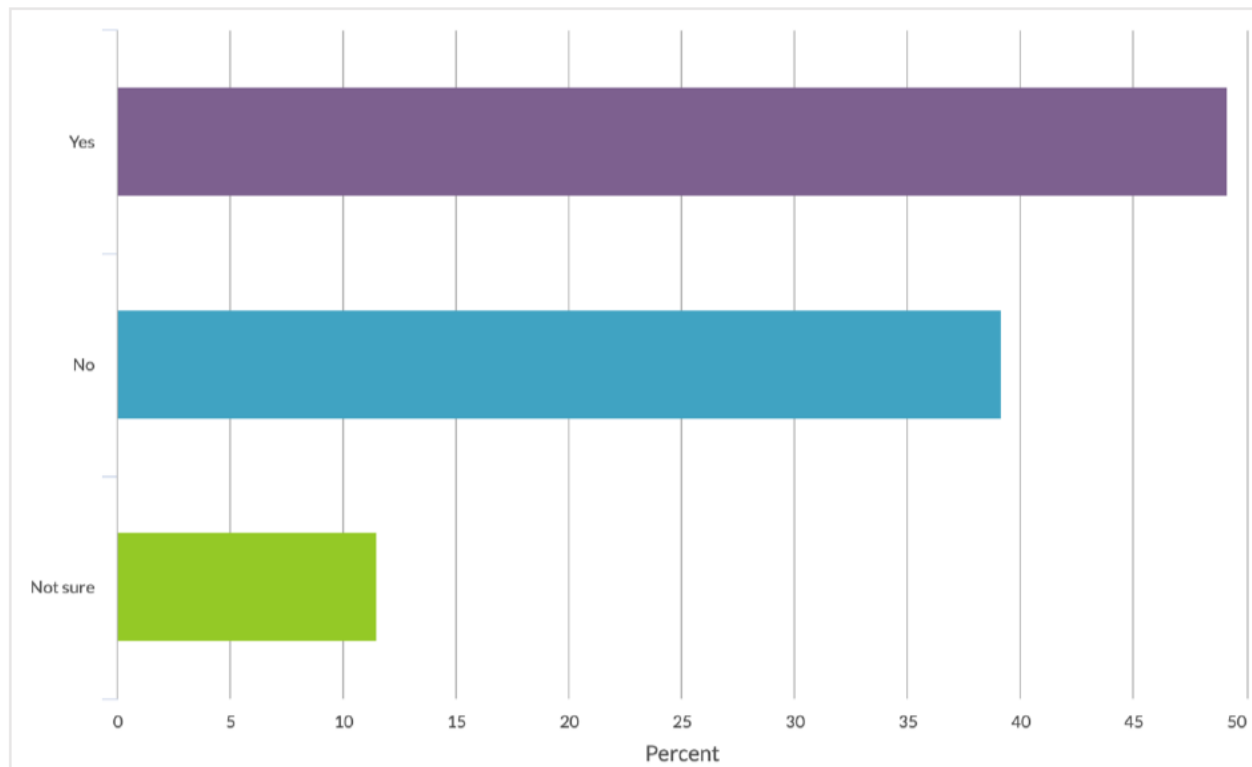

Table 9. Familiarity with accessibility laws

| <i>Familiarity with accessibility laws</i> | <i>n</i> | <i>%</i> |
|--------------------------------------------|----------|----------|
| Yes                                        | 64       | 49.2%    |
| No                                         | 51       | 39.2%    |
| Not sure                                   | 15       | 11.5%    |

Describe your level of familiarity with AODA, ADA, Section 508, or with similar laws from other governments.

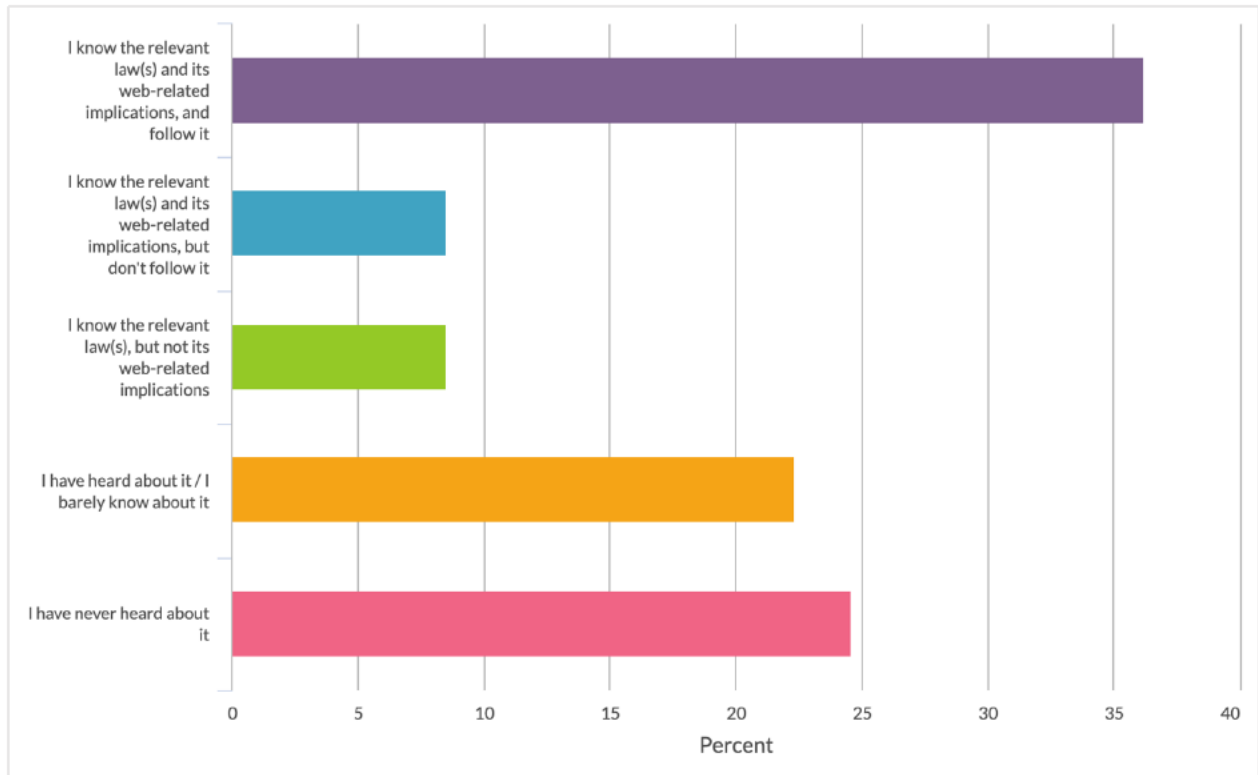

Table 10. Level of familiarity with accessibility laws

| <i>Level of familiarity with accessibility laws</i>                              | <i>n</i> | <i>%</i> |
|----------------------------------------------------------------------------------|----------|----------|
| I know the relevant law(s) and its web-related implications, and follow it       | 47       | 36.2%    |
| I know the relevant law(s) and its web-related implications, but don't follow it | 11       | 8.5%     |
| I know the relevant law(s), but not its web-related implications                 | 11       | 8.5%     |
| I have heard about it / I barely know about it                                   | 29       | 22.3%    |
| I have never heard about it                                                      | 32       | 24.6%    |

Are you familiar with any of the following accessibility guidelines from the Web Accessibility Initiative (WAI)? (Check all that apply.)

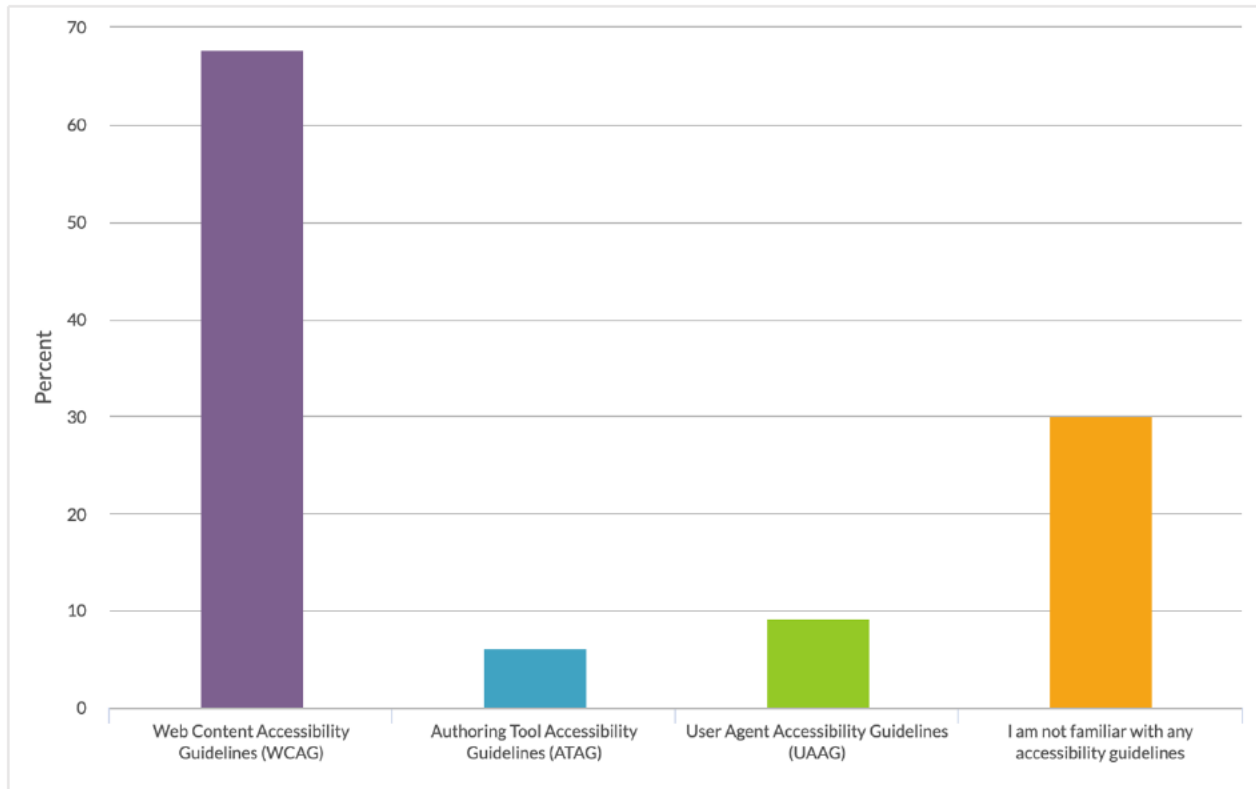

Table 11. Familiarity with accessibility guidelines

| <i>Accessibility guidelines</i>                     | <i>n</i> | <i>%</i> |
|-----------------------------------------------------|----------|----------|
| Web Content Accessibility Guidelines (WCAG)         | 88       | 67.7%    |
| Authoring Tool Accessibility Guidelines (ATAG)      | 8        | 6.2%     |
| User Agent Accessibility Guidelines (UAAG)          | 12       | 9.2%     |
| I am not familiar with any accessibility guidelines | 39       | 30%      |

Are you familiar with the senior-friendly design guidelines published by the National Institute on Aging and the National Library of Medicine?

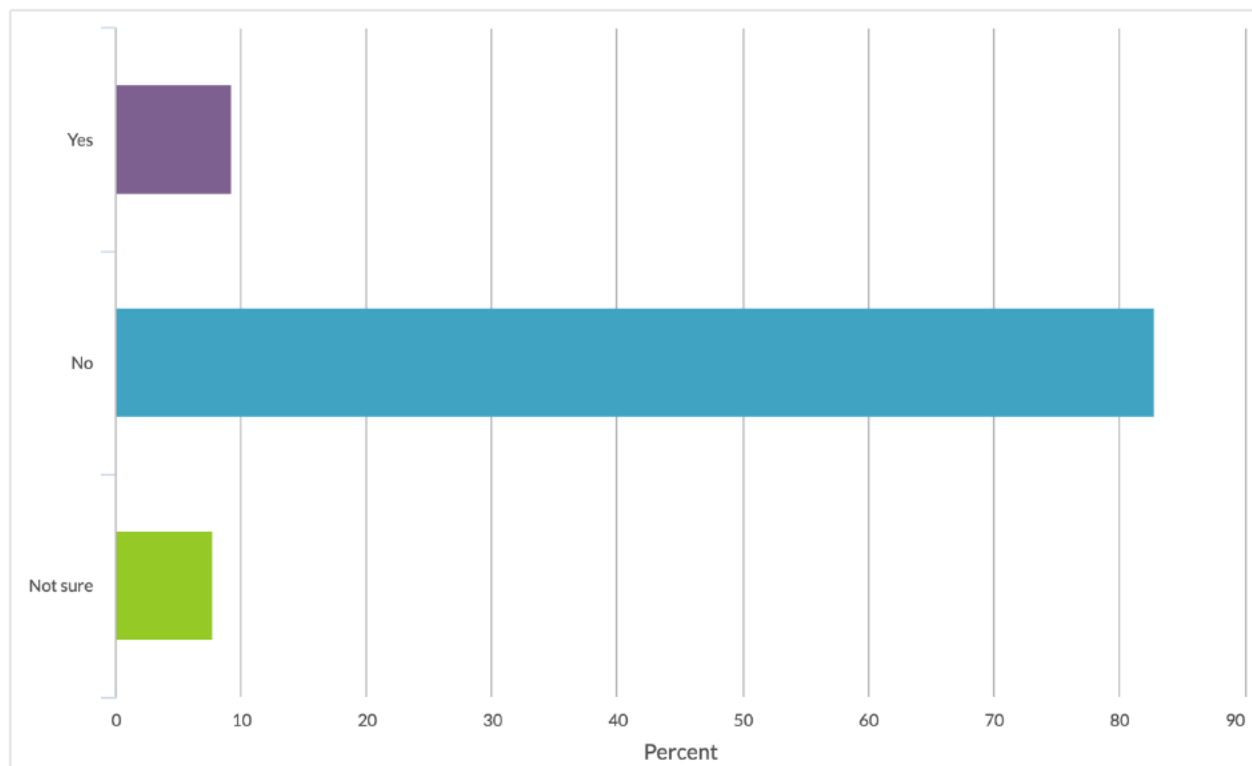

Table 12. Familiarity with senior-friendly design guidelines by NIA and NLM

| <i>Familiarity with senior-friendly design guidelines by NIA and NLM</i> | <i>n</i> | <i>%</i> |
|--------------------------------------------------------------------------|----------|----------|
| Yes                                                                      | 12       | 9.3%     |
| No                                                                       | 107      | 82.9%    |
| Not sure                                                                 | 10       | 7.8%     |

Are you familiar with any other senior-friendly guidelines?

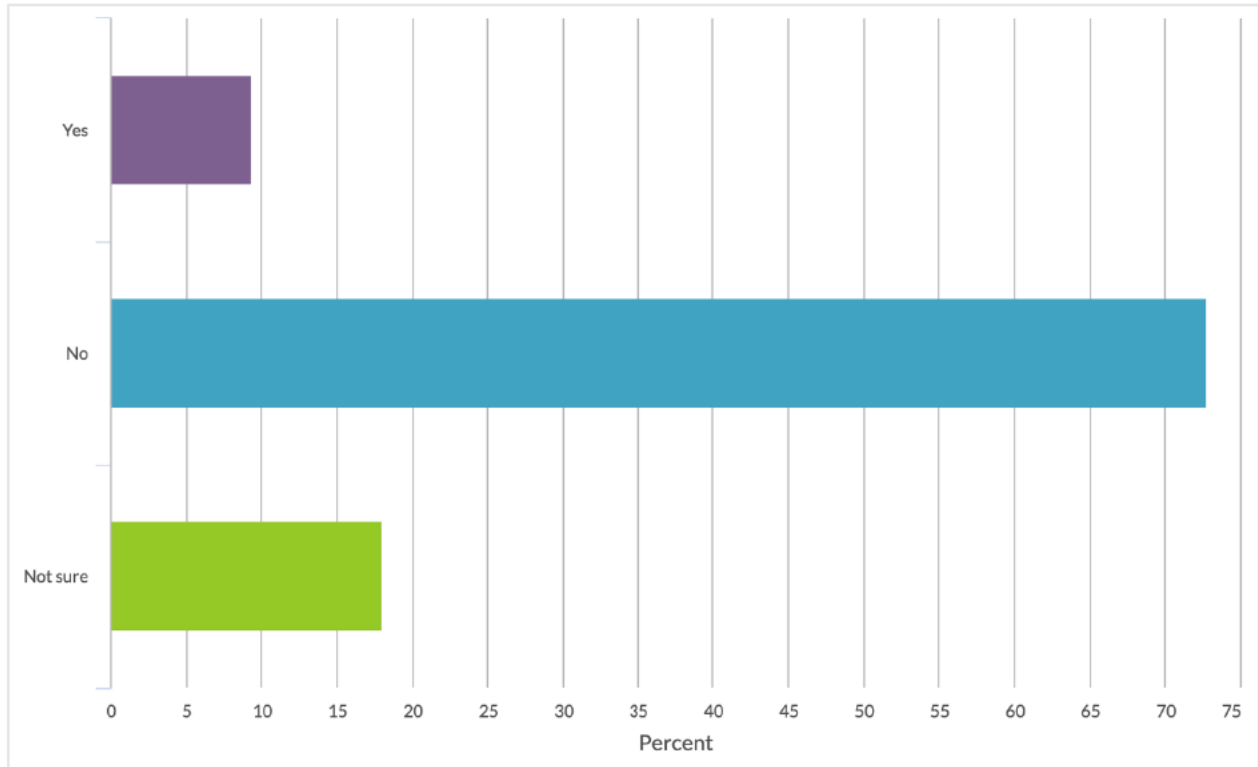

Table 13. Familiarity with other senior-friendly design guidelines

| <i>Familiarity with other senior-friendly design guidelines</i> | <i>n</i> | <i>%</i> |
|-----------------------------------------------------------------|----------|----------|
| Yes                                                             | 12       | 9.4%     |
| No                                                              | 93       | 72.7%    |
| Not sure                                                        | 23       | 18%      |

Are you aware that there are accessibility tools that can check your website to see if it is accessible, and provide useful feedback?

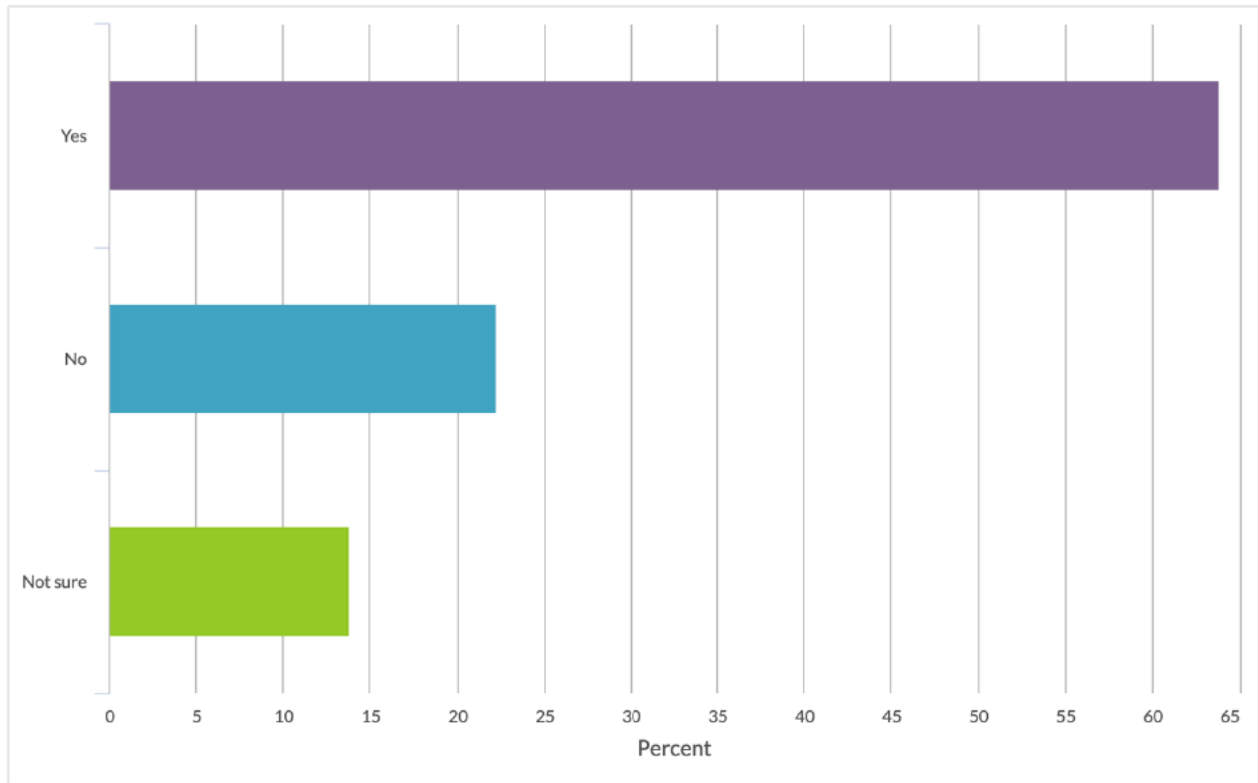

Table 14. Familiarity with accessibility tools

| <i>Familiarity with accessibility tools</i> | <i>n</i> | <i>%</i> |
|---------------------------------------------|----------|----------|
| Yes                                         | 83       | 63.8%    |
| No                                          | 29       | 22.3%    |
| Not sure                                    | 18       | 13.8%    |

### Section 3: Practical Experiences

Have you ever created a website or app that is accessible for users with visual impairments (blindness, low vision, and/or colour blindness)?

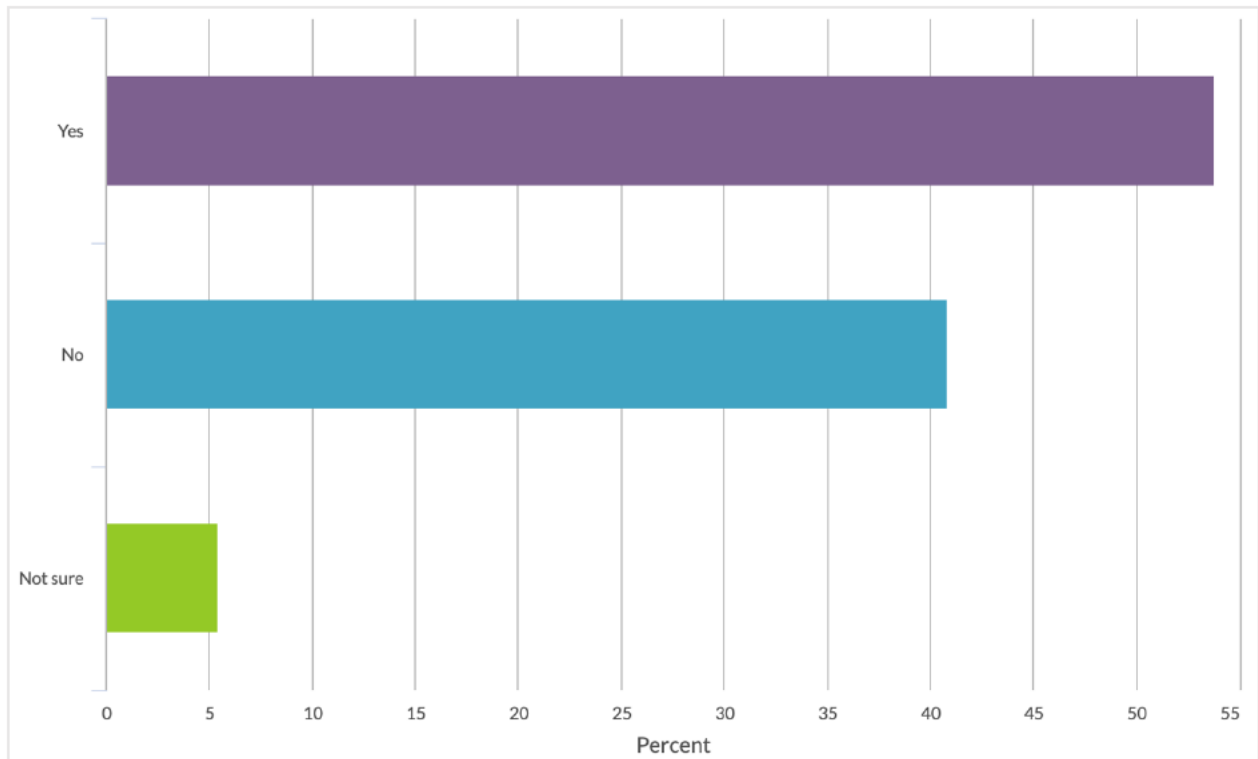

Table 15. Previous experience in designing for users with visual impairments

| <i>Previous experience in designing for users with visual impairments</i> | <i>n</i> | <i>%</i> |
|---------------------------------------------------------------------------|----------|----------|
| Yes                                                                       | 70       | 53.8%    |
| No                                                                        | 53       | 40.8%    |
| Not sure                                                                  | 7        | 5.4%     |

Have you ever created a website or app that is accessible for seniors?

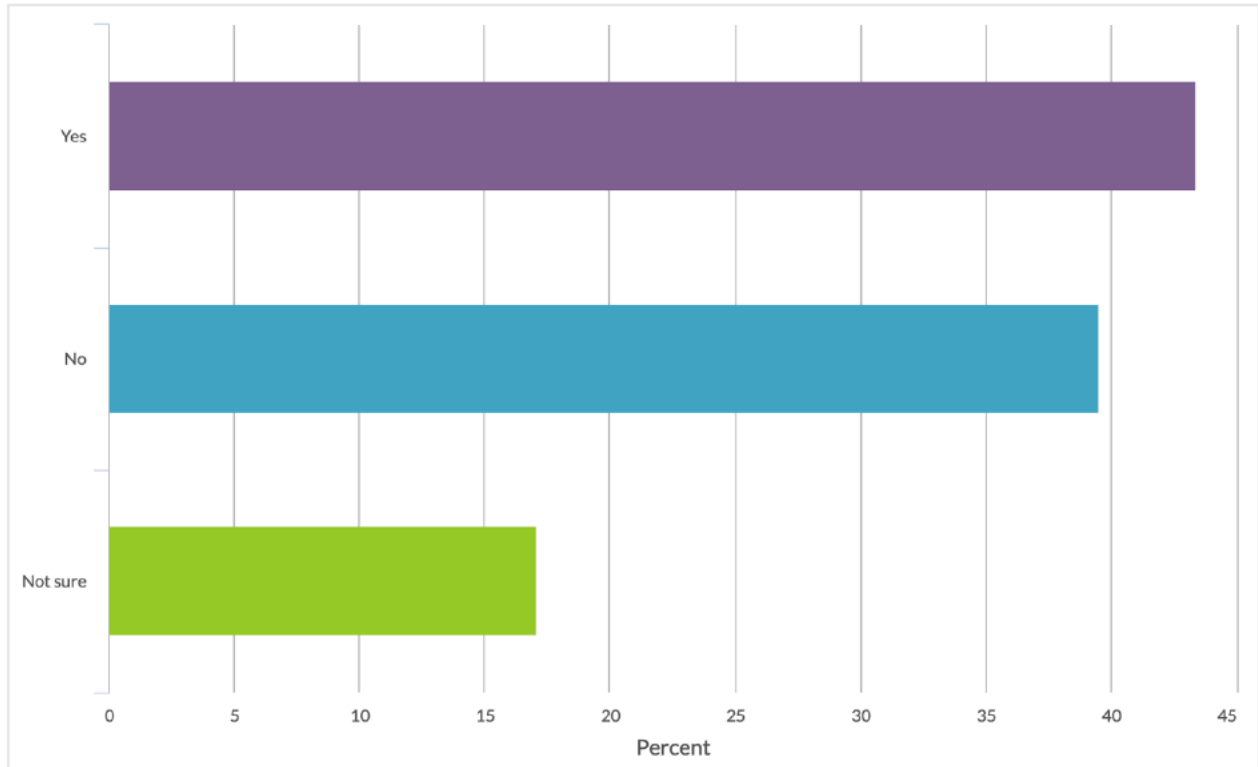

Table 16. Previous experience in designing for senior users

| <i>Previous experience in designing for senior users</i> | <i>n</i> | <i>%</i> |
|----------------------------------------------------------|----------|----------|
| Yes                                                      | 56       | 43.4%    |
| No                                                       | 51       | 39.5%    |
| Not sure                                                 | 22       | 17.1%    |



Do you consider accessibility in the design projects you are involved in?

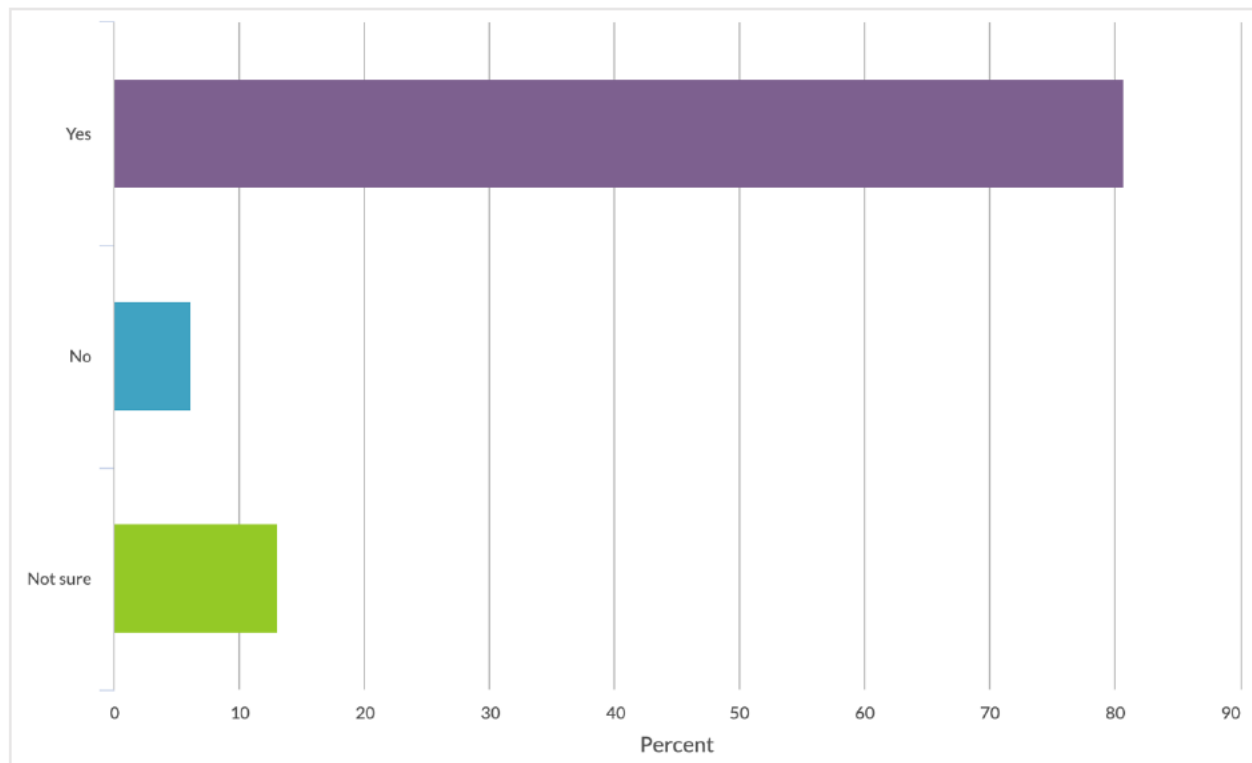

Table 17. Consideration of accessibility in design projects

| <i>Consideration of accessibility in design projects</i> | <i>n</i> | <i>%</i> |
|----------------------------------------------------------|----------|----------|
| Yes                                                      | 105      | 80.8%    |
| No                                                       | 8        | 6.2%     |
| Not sure                                                 | 17       | 13.1%    |

What research methods have you used to ensure your design meets the requirements of users with disabilities? (Check all that apply.)

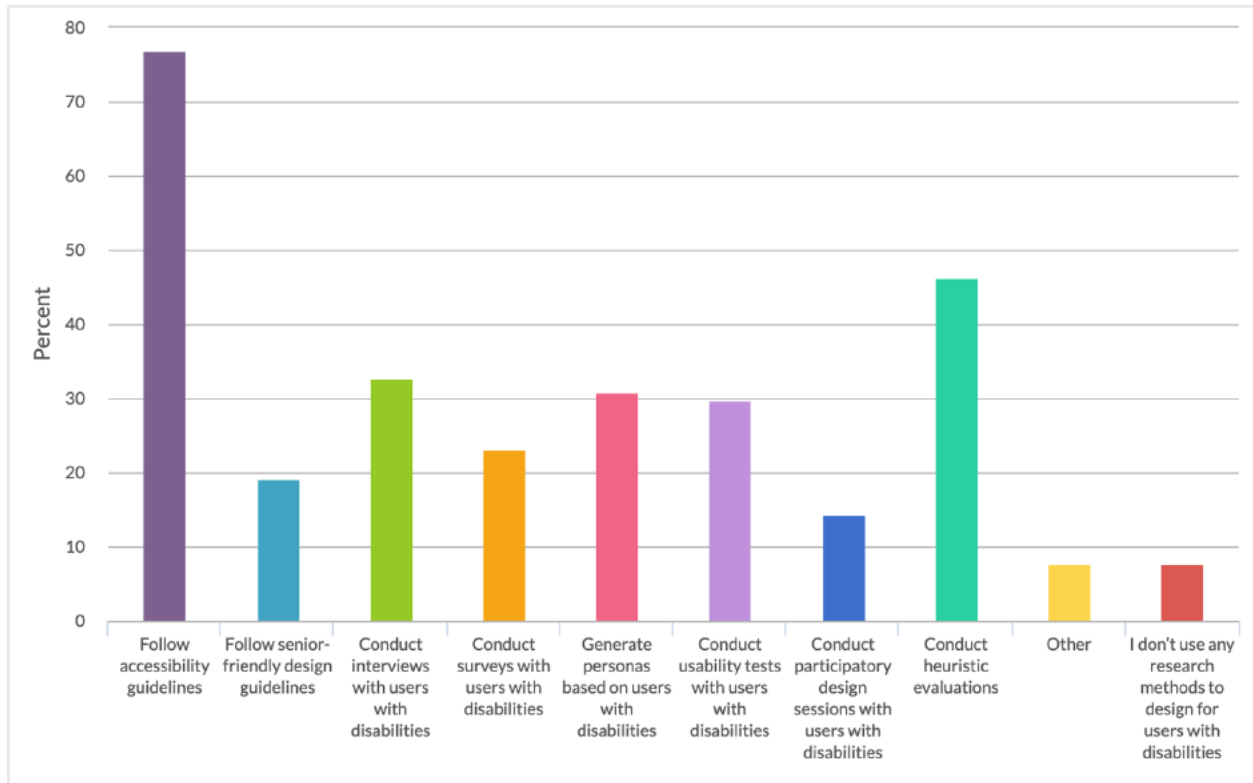

Table 18. Research methods for designing for users with disabilities

| <i>Research methods</i>                                                | <i>n</i> | <i>%</i> |
|------------------------------------------------------------------------|----------|----------|
| Follow accessibility guidelines                                        | 80       | 76.9%    |
| Follow senior-friendly design guidelines                               | 20       | 19.2%    |
| Conduct interviews with users with disabilities                        | 34       | 32.7%    |
| Conduct surveys with users with disabilities                           | 24       | 23.1%    |
| Generate personas based on users with disabilities                     | 32       | 30.8%    |
| Conduct usability tests with users with disabilities                   | 31       | 29.8%    |
| Conduct participatory design sessions with users with disabilities     | 15       | 14.4%    |
| Conduct heuristic evaluations                                          | 48       | 46.2%    |
| Other                                                                  | 8        | 7.7%     |
| I don't use any research methods to design for users with disabilities | 8        | 7.7%     |

What evaluation techniques have you used to test your designs for accessibility? (Check all that apply.)

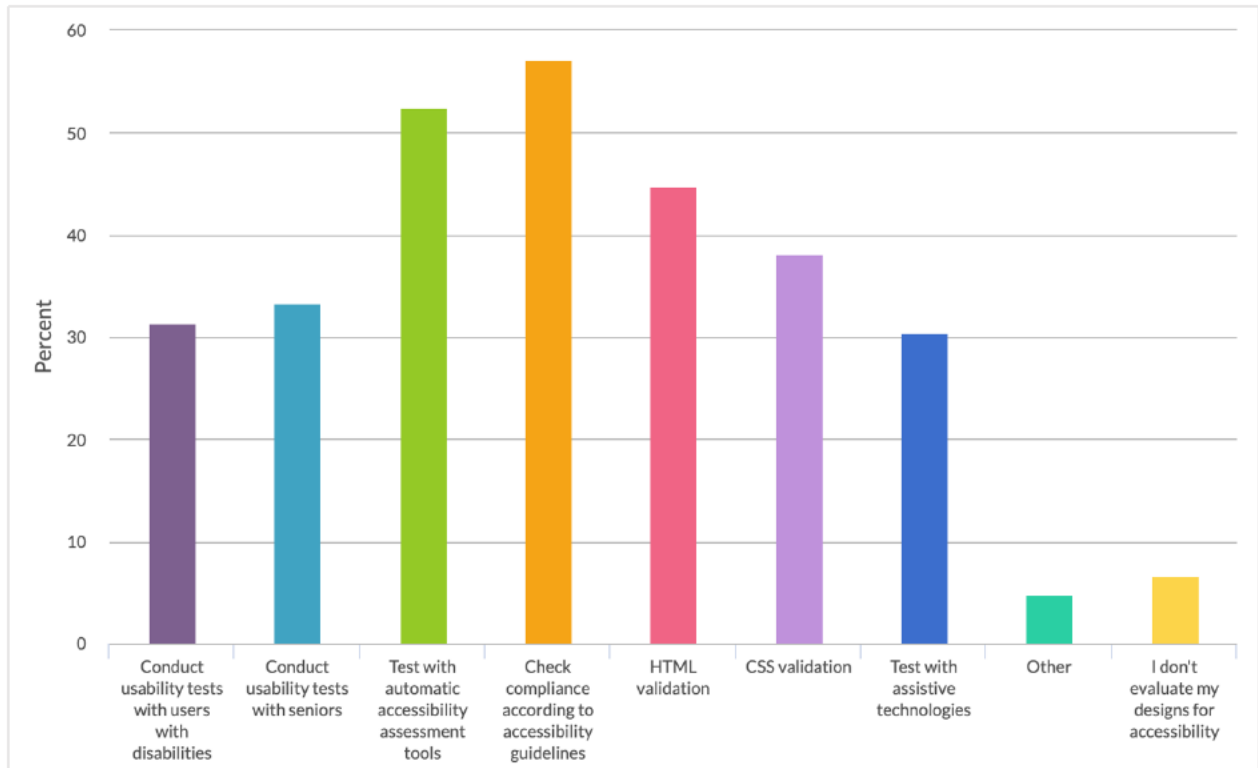

Table 19. Evaluation techniques for designing for users with disabilities

| <i>Evaluation techniques</i>                           | <i>n</i> | <i>%</i> |
|--------------------------------------------------------|----------|----------|
| Conduct usability tests with users with disabilities   | 33       | 31.4%    |
| Conduct usability tests with seniors                   | 35       | 33.3%    |
| Test with automatic accessibility assessment tools     | 55       | 52.4%    |
| Check compliance according to accessibility guidelines | 60       | 57.1%    |
| HTML validation                                        | 47       | 44.8%    |
| CSS validation                                         | 40       | 38.1%    |
| Test with assistive technologies                       | 32       | 30.5%    |
| Other                                                  | 5        | 4.8%     |
| I don't evaluate my designs for accessibility          | 7        | 6.7%     |

Do you consider senior-friendliness in the design projects you are involved in?

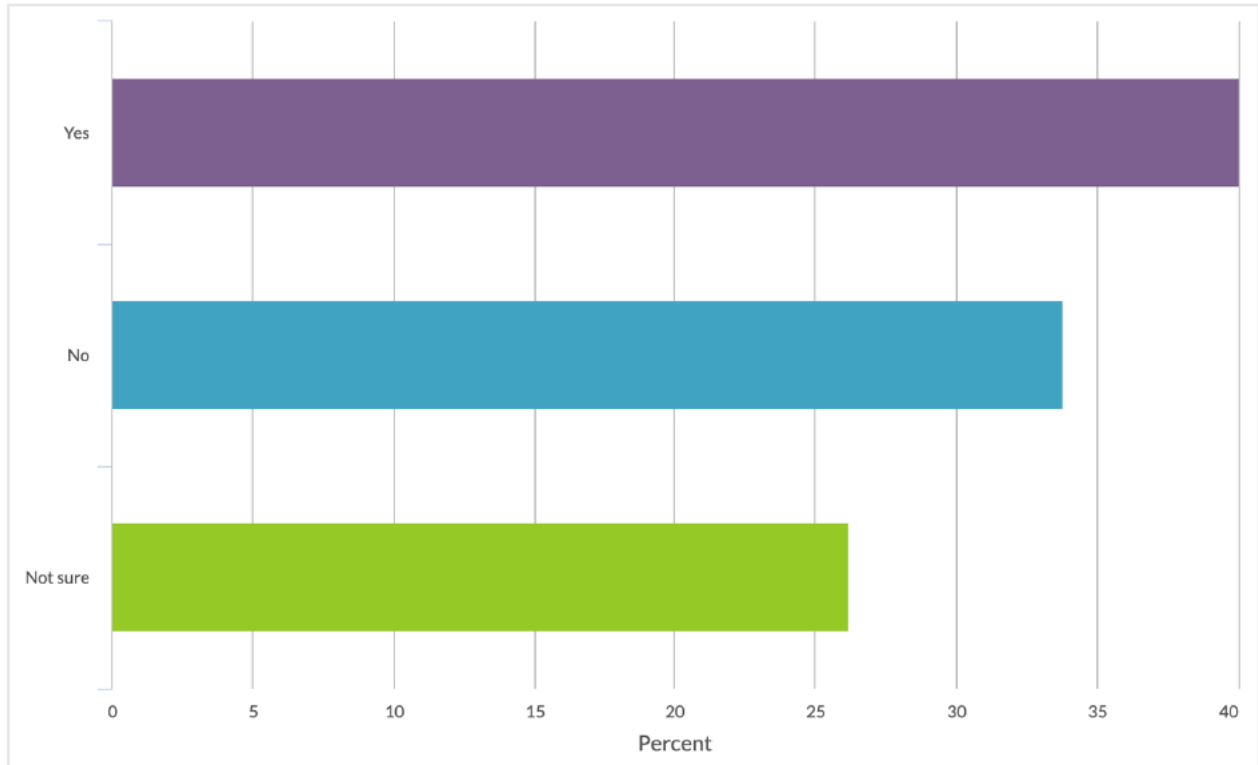

Table 20. Consideration of senior-friendliness in design projects

| <i>Consideration of senior-friendliness in design projects</i> | <i>n</i> | <i>%</i> |
|----------------------------------------------------------------|----------|----------|
| Yes                                                            | 52       | 40%      |
| No                                                             | 44       | 33.8%    |
| Not sure                                                       | 34       | 26.2%    |

What research methods have you used to ensure your design meets the requirements of seniors? (Check all that apply.)

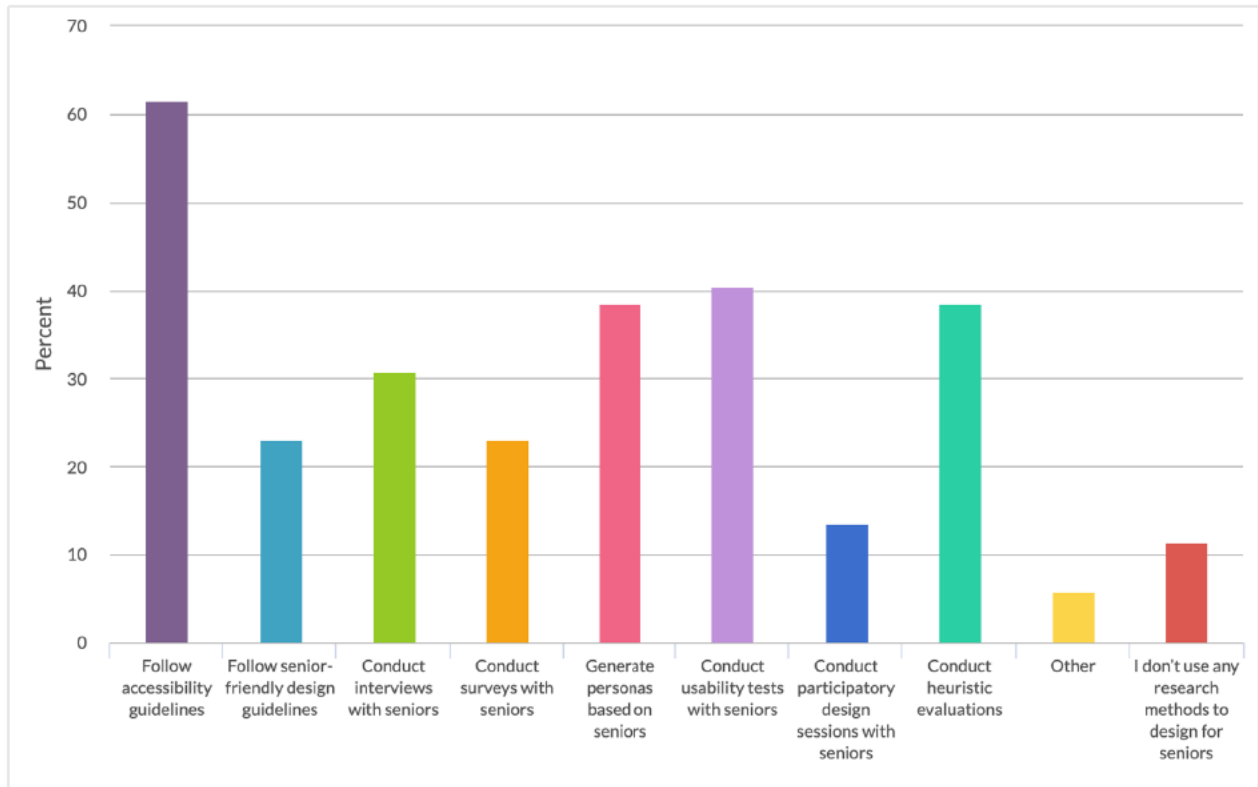

Table 21. Research methods for designing for senior users

| <i>Research methods</i>                                | <i>n</i> | <i>%</i> |
|--------------------------------------------------------|----------|----------|
| Follow accessibility guidelines                        | 32       | 61.5%    |
| Follow senior-friendly design guidelines               | 12       | 23.1%    |
| Conduct interviews with seniors                        | 16       | 30.8%    |
| Conduct surveys with seniors                           | 12       | 23.1%    |
| Generate personas based on seniors                     | 20       | 38.5%    |
| Conduct usability tests with seniors                   | 21       | 40.4%    |
| Conduct participatory design sessions with seniors     | 7        | 13.5%    |
| Conduct heuristic evaluations                          | 20       | 38.5%    |
| Other                                                  | 3        | 5.8%     |
| I don't use any research methods to design for seniors | 6        | 11.5%    |

What evaluation techniques have you used to test your designs for senior-friendliness? (Check all that apply.)

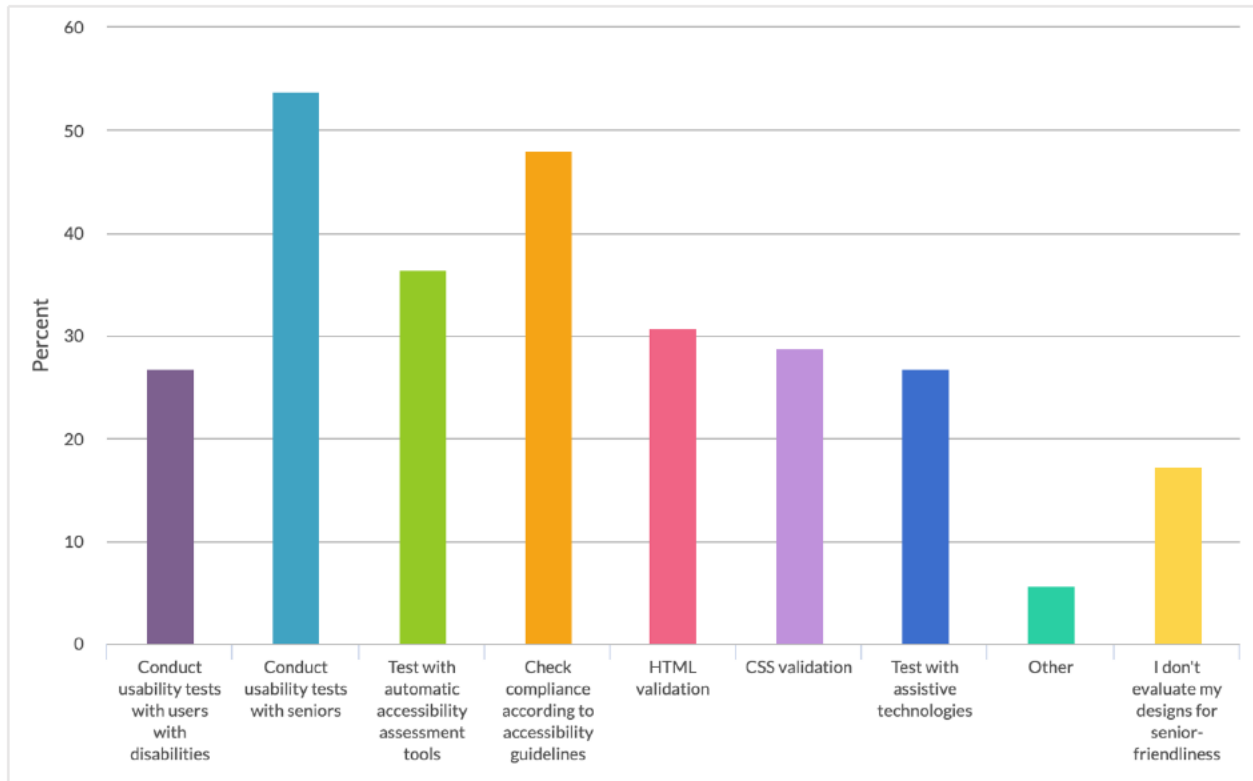

Table 22. Evaluation techniques for designing for senior users

| <i>Evaluation techniques</i>                           | <i>n</i> | <i>%</i> |
|--------------------------------------------------------|----------|----------|
| Conduct usability tests with users with disabilities   | 14       | 26.9%    |
| Conduct usability tests with seniors                   | 28       | 53.8%    |
| Test with automatic accessibility assessment tools     | 19       | 36.5%    |
| Check compliance according to accessibility guidelines | 25       | 48.1%    |
| HTML validation                                        | 16       | 30.8%    |
| CSS validation                                         | 15       | 28.8%    |
| Test with assistive technologies                       | 14       | 26.9%    |
| Other                                                  | 3        | 5.8%     |
| I don't evaluate my designs for senior-friendliness    | 9        | 17.3%    |

## Section 4: Motivations and Challenges

How is accessibility for seniors perceived in your organization or your independent practice?

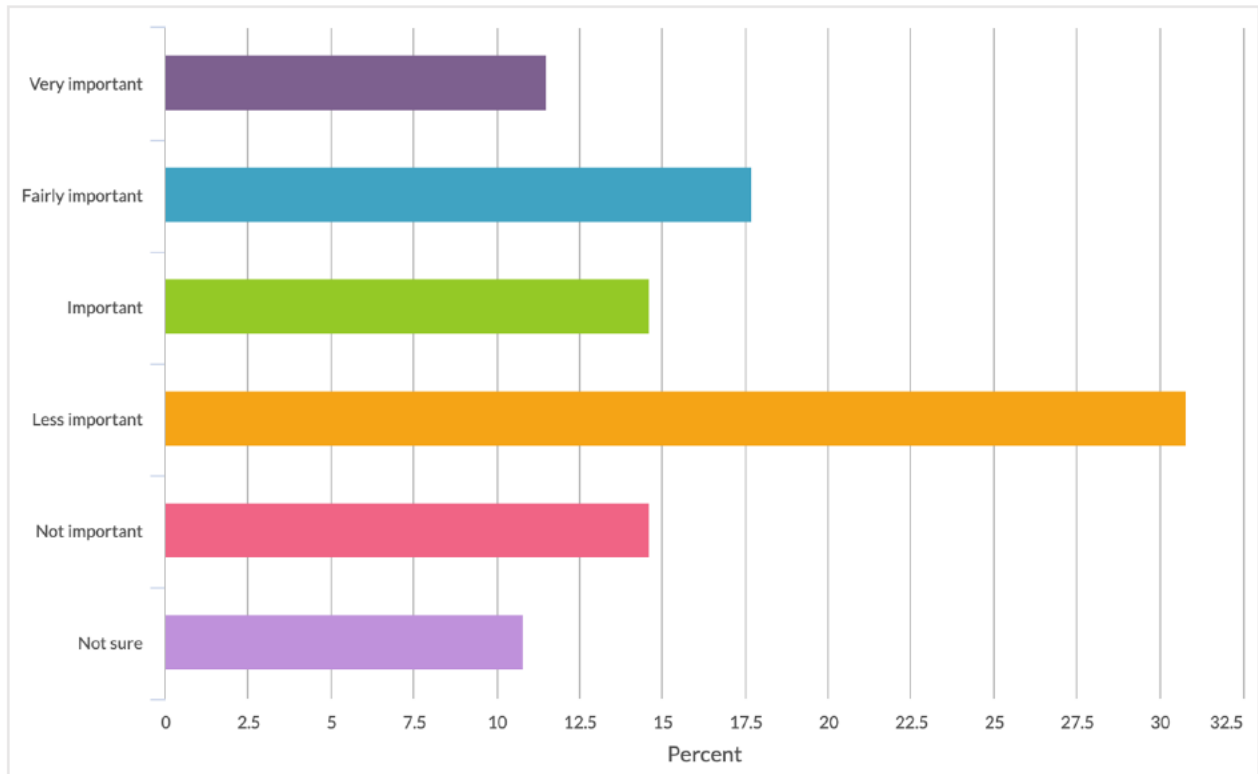

Table 23. Importance of usability for seniors in organizations

| <i>Level of importance</i> | <i>n</i> | <i>%</i> |
|----------------------------|----------|----------|
| Very important             | 15       | 11.5%    |
| Fairly important           | 23       | 17.7%    |
| Important                  | 19       | 14.6%    |
| Less important             | 40       | 30.8%    |
| Not important              | 19       | 14.6%    |
| Not sure                   | 14       | 10.8%    |

What factors would influence your organization or your independent practice to make their designs accessible for seniors? (Check all that apply.)

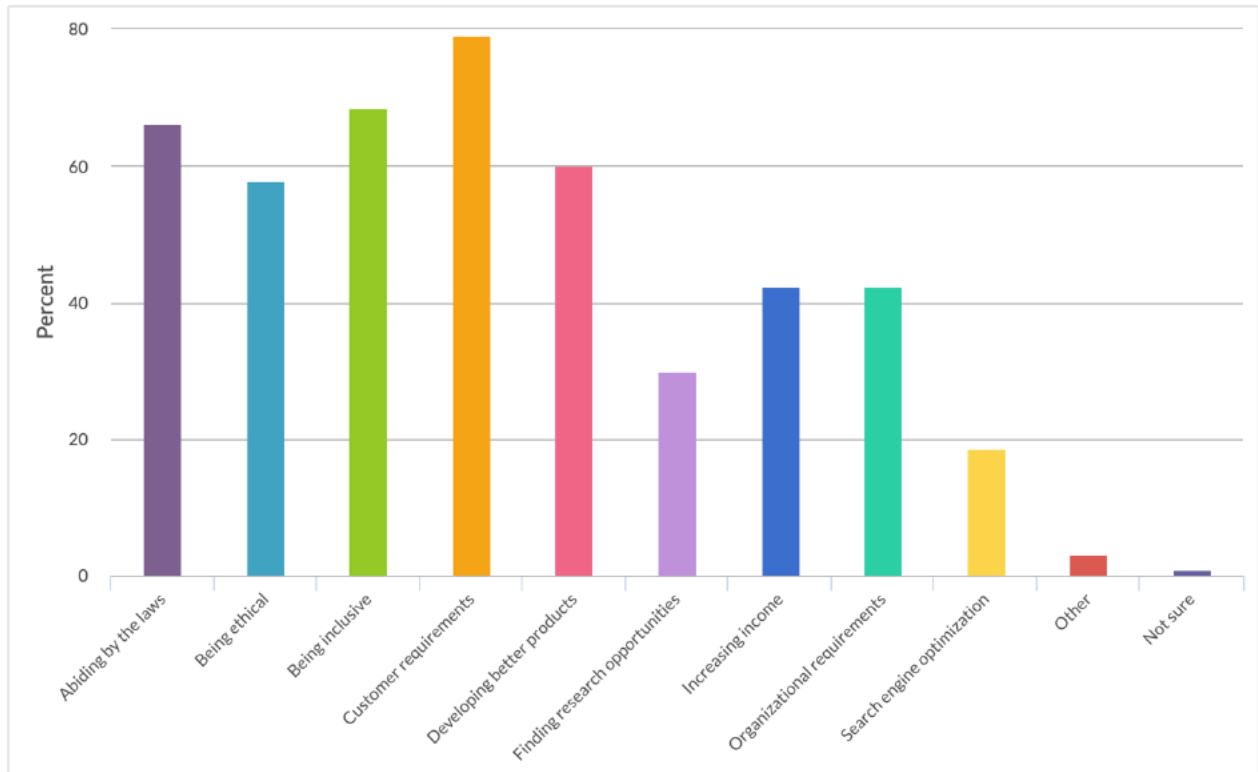

Table 24. Organizational motivations for ensuring usability for seniors

| <i>Organizational motivations</i> | <i>n</i> | <i>%</i> |
|-----------------------------------|----------|----------|
| Abiding by the laws               | 86       | 66.2%    |
| Being ethical                     | 75       | 57.7%    |
| Being inclusive                   | 89       | 68.5%    |
| Customer requirements             | 103      | 79.2%    |
| Developing better products        | 78       | 60%      |
| Finding research opportunities    | 39       | 30%      |
| Increasing income                 | 55       | 42.3%    |
| Organizational requirements       | 55       | 42.3%    |
| Search engine optimization        | 24       | 18.5%    |
| Other                             | 4        | 3.1%     |
| Not sure                          | 1        | 0.8%     |



What factors would influence you personally to make your designs accessible for seniors?  
(Check all that apply.)

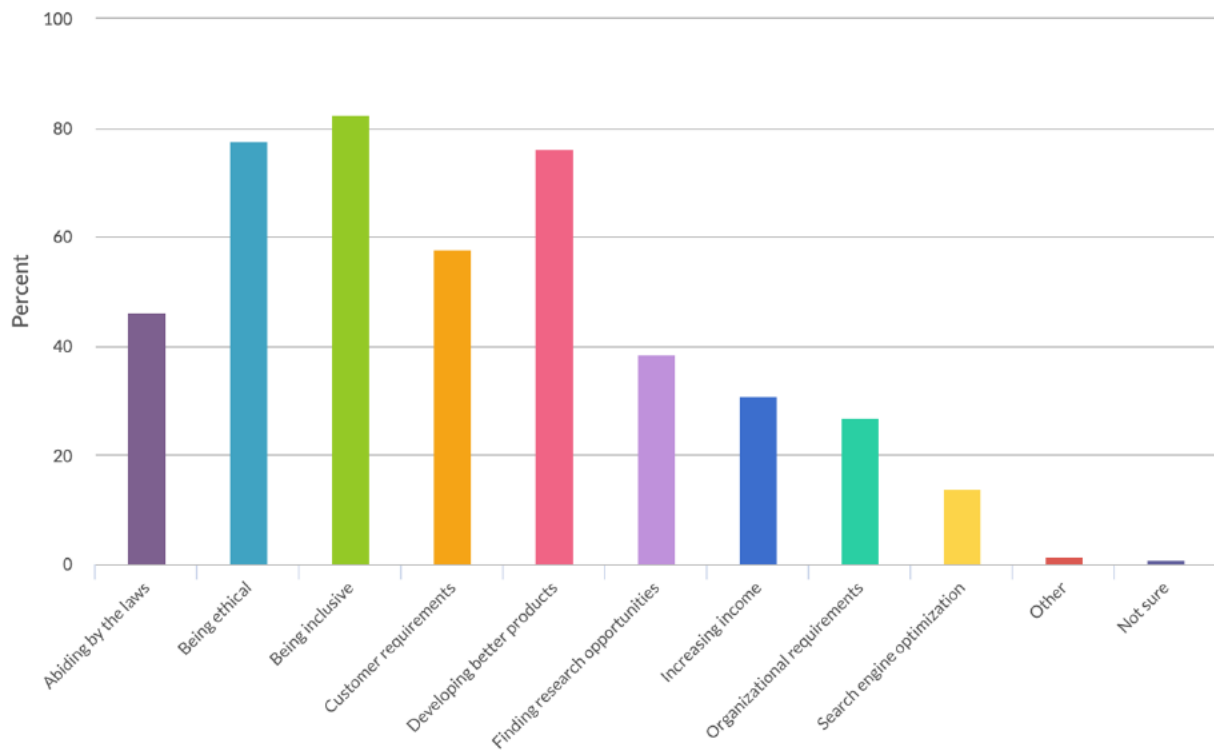

Table 25. Personal motivations for ensuring usability for seniors

| <i>Personal motivations</i>    | <i>n</i> | <i>%</i> |
|--------------------------------|----------|----------|
| Abiding by the laws            | 60       | 46.2%    |
| Being ethical                  | 101      | 77.7%    |
| Being inclusive                | 107      | 82.3%    |
| Customer requirements          | 75       | 57.7%    |
| Developing better products     | 99       | 76.2%    |
| Finding research opportunities | 50       | 38.5%    |
| Increasing income              | 40       | 30.8%    |
| Organizational requirements    | 35       | 26.9%    |
| Search engine optimization     | 18       | 13.8%    |
| Other                          | 2        | 1.5%     |
| Not sure                       | 1        | 0.8%     |

What do you think are the challenges of making websites or apps senior-friendly? (Check all that apply.)

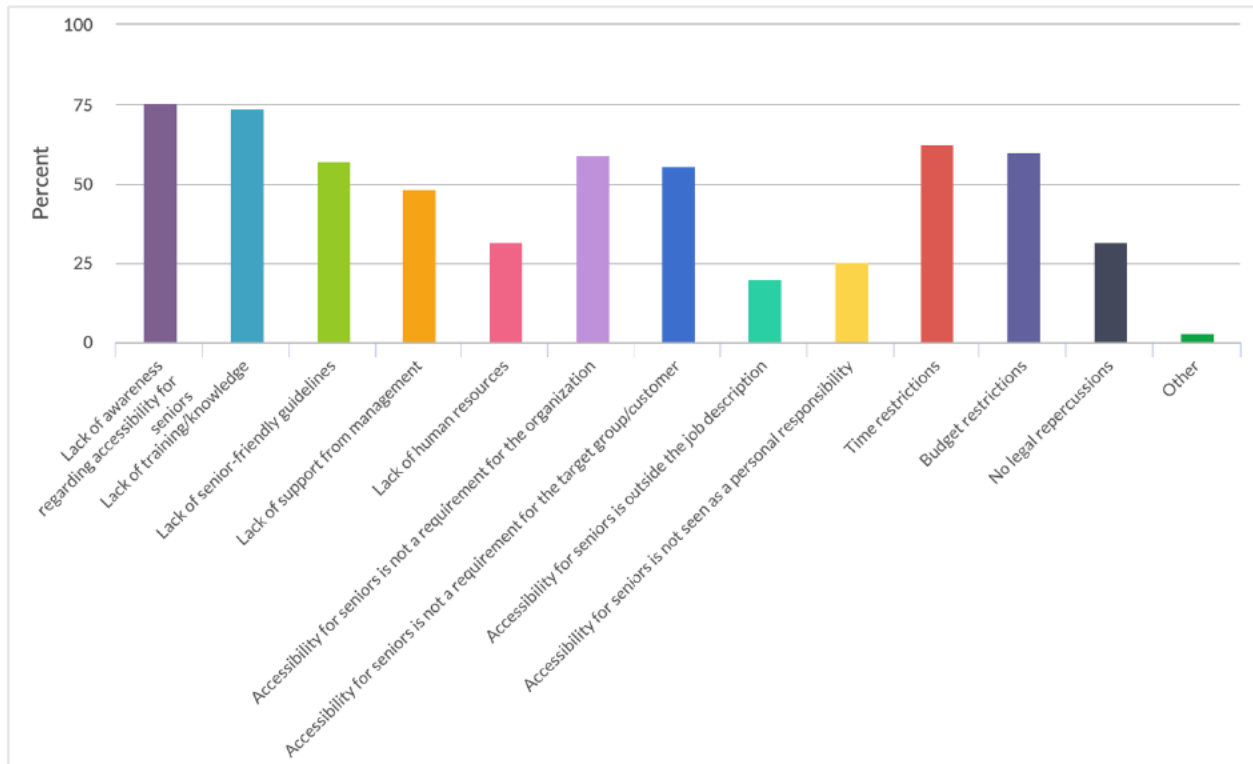

Table 26. Challenges of ensuring usability for seniors

| Challenges                                                                   | <i>n</i> | %     |
|------------------------------------------------------------------------------|----------|-------|
| Lack of awareness regarding accessibility for seniors                        | 98       | 75.4% |
| Lack of training/knowledge                                                   | 96       | 73.8% |
| Lack of senior-friendly guidelines                                           | 74       | 56.9% |
| Lack of support from management                                              | 63       | 48.5% |
| Lack of human resources                                                      | 41       | 31.5% |
| Accessibility for seniors is not a requirement for the organization          | 77       | 59.2% |
| Accessibility for seniors is not a requirement for the target group/customer | 72       | 55.4% |
| Accessibility for seniors is outside the job description                     | 26       | 20%   |
| Accessibility for seniors is not seen as a personal responsibility           | 33       | 25.4% |
| Time restrictions                                                            | 81       | 62.3% |
| Budget restrictions                                                          | 78       | 60%   |
| No legal repercussions                                                       | 41       | 31.5% |
| Other                                                                        | 4        | 3.1%  |
